# Supplementary material for: Chemical Composition, Anti-Breast Cancer Activity and Extraction Techniques of Ent-Abietane Diterpenoids from Euphorbia fischeriana Steud
Source: MDPI journal article supplement (doi:10.3390/molecules27134282), 2022-07-03
Supplement: s1 [file s1]

## **Supplementary Materials**

### **Chemical Composition, Anti-Breast Cancer Activity and Extraction Techniques of Ent-Abietane Diterpenoids from *Euphorbia fischeriana* Steud**

**Gang Chen <sup>1</sup>, Tiancheng Ma <sup>1,2</sup>, Yukun Ma <sup>1</sup>, Cuicui Han <sup>3,\*</sup>, Jinling Zhang <sup>1</sup> and Yu Sun <sup>1,\*</sup>**

*<sup>1</sup>Research Institute of Medicine and Pharmacy, Qiqihar Medical University, Bukui Road 333, Qiqihar 161006, China*

*<sup>2</sup>School of Traditional Chinese Materia Medica, Shenyang Pharmaceutical University, Wenhua Road 103, Shenyang 110016, China*

*<sup>3</sup>College of Pharmacy, Qiqihar Medical University, Bukui Road 333, Qiqihar 161006, China*

## **Abstract**

Figure S1.  $^1\text{H}$ -NMR spectrum of compound **1**.

Figure S2.  $^{13}\text{C}$ -NMR spectrum of compound **1**.

Figure S3. DEPT spectrum of compound **1**.

Figure S4. HSQC spectrum of compound **1**.

Figure S5. HMBC spectrum of compound **1**.

Figure S6.  $^1\text{H}$ - $^1\text{H}$  COSY spectrum of compound **1**.

Figure S7. NOESY spectrum of compound **1**.

Figure S8. HRESIMS data of compound **1**.

Figure S9. The purity of compound **1**.

Figure S10.  $^1\text{H}$ -NMR spectrum of compound **2**.

Figure S11.  $^{13}\text{C}$ -NMR spectrum of compound **2**.

Figure S12. HRESIMS data of compound **2**.

Figure S13. The purity of compound **2**.

Figure S14.  $^1\text{H}$ -NMR spectrum of compound **3**.

Figure S15.  $^{13}\text{C}$ -NMR spectrum of compound **3**.

Figure S16. HRESIMS data of compound **3**.

Figure S17. The purity of compound **3**.

Figure S18.  $^1\text{H}$ -NMR spectrum of compound **4**.

Figure S19.  $^{13}\text{C}$ -NMR spectrum of compound **4**.

Figure S20. HRESIMS data of compound **4**.

Figure S21. The purity of compound **4**.

Figure S22.  $^1\text{H}$ -NMR spectrum of compound **5**.

Figure S23.  $^{13}\text{C}$ -NMR spectrum of compound **5**.

Figure S24. HRESIMS data of compound **5**.

Figure S25. The purity of compound **5**.

Figure S26.  $^1\text{H}$ -NMR spectrum of compound **6**.

Figure S27.  $^{13}\text{C}$ -NMR spectrum of compound **6**.

Figure S28. HRESIMS data of compound **6**.

Figure S29. The purity of compound **6**.

Figure S30.  $^1\text{H}$ -NMR spectrum of compound **7**.

Figure S31.  $^{13}\text{C}$ -NMR spectrum of compound **7**.

Figure S32. HRESIMS data of compound **7**.

Figure S33. The purity of compound **7**.

Figure S34.  $^1\text{H}$ -NMR spectrum of compound **8**.

Figure S35.  $^{13}\text{C}$ -NMR spectrum of compound **8**.

Figure S36. HRESIMS data of compound **8**.

Figure S37. The purity of compound **8**.

Figure S38.  $^1\text{H}$ -NMR spectrum of compound **9**.

Figure S39.  $^{13}\text{C}$ -NMR spectrum of compound **9**.

Figure S40. HRESIMS data of compound **9**.

Figure S41. The purity of compound **9**.

Figure S42.  $^1\text{H}$ -NMR spectrum of compound **10**.

Figure S43.  $^{13}\text{C}$ -NMR spectrum of compound **10**.

Figure S44. HRESIMS data of compound **10**.

Figure S45. The purity of compound **10**.

Figure S46.  $^1\text{H}$ -NMR spectrum of compound **11**.

Figure S47.  $^{13}\text{C}$ -NMR spectrum of compound **11**.

Figure S48. HRESIMS data of compound **11**.

Figure S49. The purity of compound **11**.

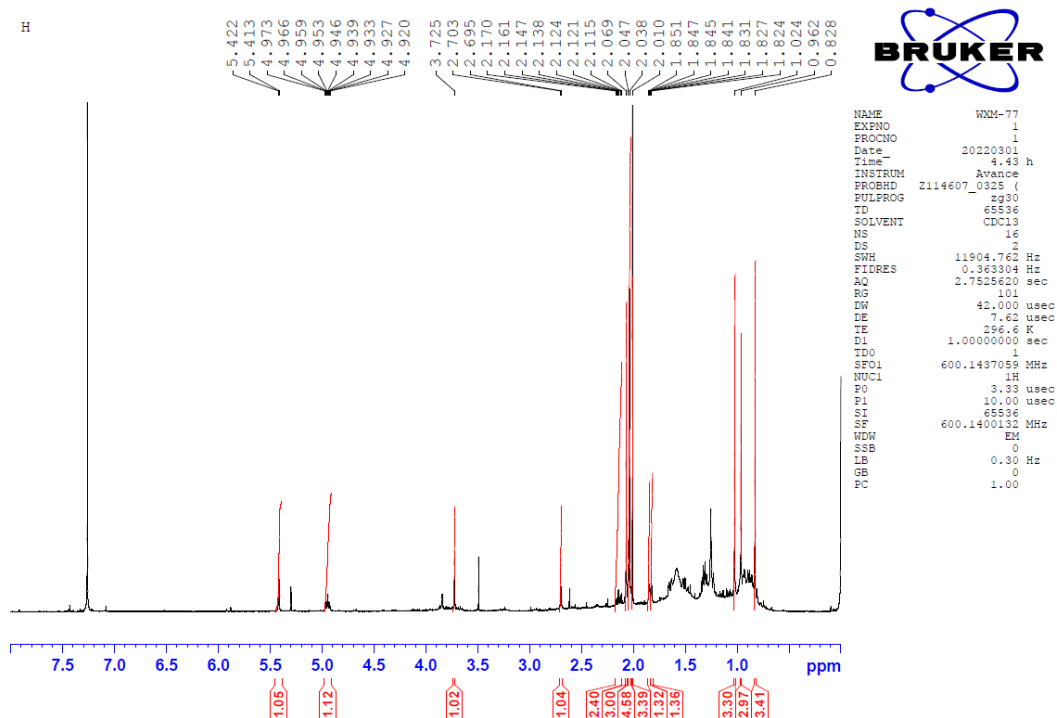

Figure S1. <sup>1</sup>H-NMR spectrum of compound **1**.

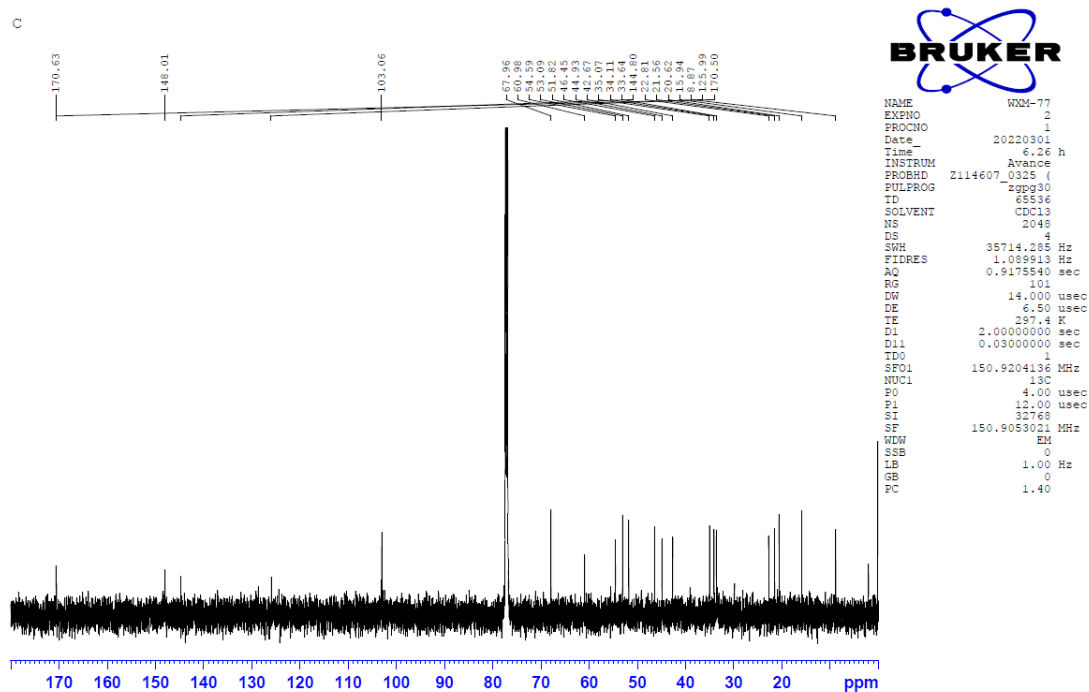

Figure S2. <sup>13</sup>C-NMR spectrum of compound **1**.

DEPT

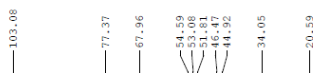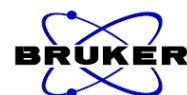

NAME WNM-77-2  
EXPNO 12  
PROCNO 1  
Date\_ 20220323  
Time\_ 17.57 h  
INSTRUM Avance  
PROBHD Z114607 0325 ( )  
PULPROG deptsp135  
TD 65536  
SOLVENT CDCl3  
NS 256  
DS 8  
SWH 35714.285 Hz  
FIDRES 1.089913 Hz  
AQ 0.9175540 sec  
RG 101  
DW 14.000 usec  
DE 6.50 usec  
TE 295.3 K  
CNST2 145.0000000  
D1 2.00000000 sec  
D2 0.00344828 sec  
D12 0.00002000 sec  
TD0 1  
SFO1 150.9173955 MHz  
NUC1 13C  
P1 12.00 usec  
P13 2000.00 usec  
SI 32768  
SF 150.9053025 MHz  
WDW EM  
SSB 0  
LB 1.00 Hz  
GB 0  
PC 1.40

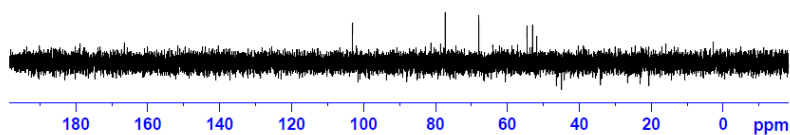

Figure S3. DEPT spectrum of compound 1.

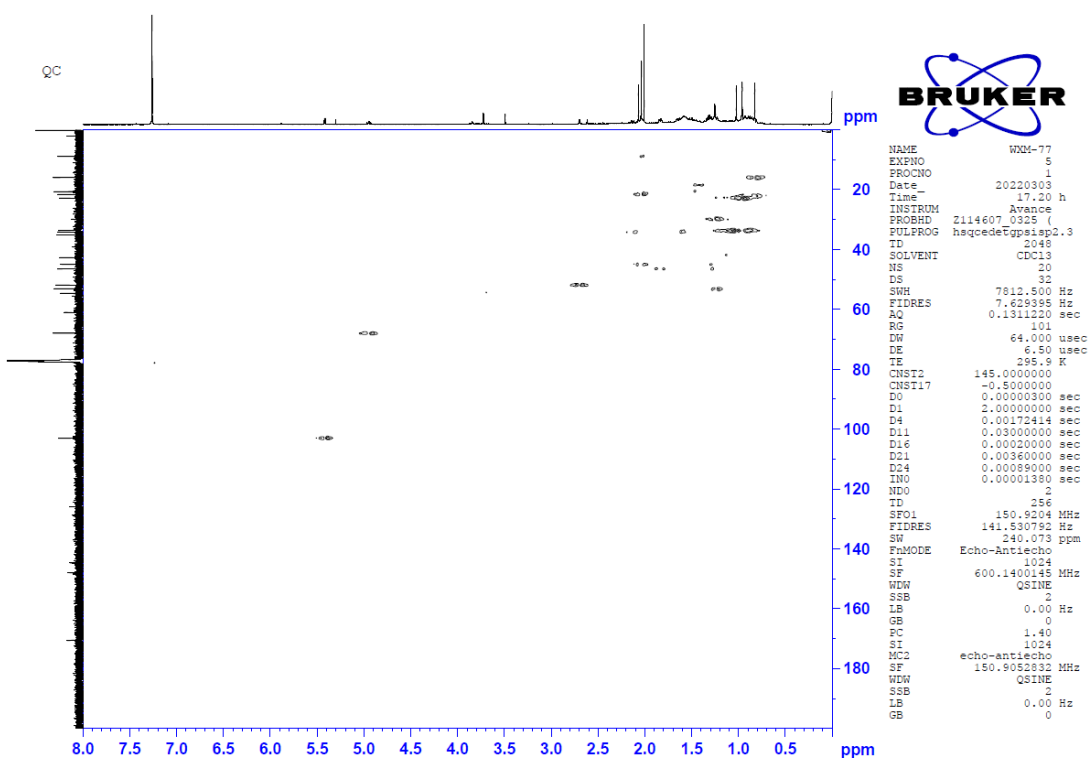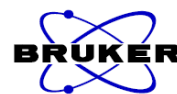

NAME WNM-77  
EXPNO 5  
PROCNO 1  
Date\_ 20220303  
Time\_ 17.20 h  
INSTRUM Avance  
PROBHD Z114607 0325 ( )  
PULPROG hsqcdeftgpcisp2.3  
TD 2048  
SOLVENT CDCl3  
NS 20  
DS 32  
SWH 7812.500 Hz  
FIDRES 7.629395 Hz  
AQ 0.1311220 sec  
RG 101  
DW 64.000 usec  
DE 6.50 usec  
TE 295.9 K  
CNST2 145.0000000  
D0 -0.5000000 sec  
D1 0.00000300 sec  
D4 2.00000000 sec  
D4 0.00172414 sec  
D11 0.03000000 sec  
D16 0.00020000 sec  
D21 0.00360000 sec  
D24 0.00089000 sec  
IND0 0.00001350 sec  
ND0 2  
TD 256  
SFO1 150.9204 MHz  
FIDRES 141.530792 Hz  
SW 240.073 ppm  
F2MODE Echo-Antiecho  
SI 1024  
SF 600.1400145 MHz  
WDW QSINE  
SSB 2  
LB 0.00 Hz  
GB 0  
PC 1.40  
SI 1024  
MCR2 echo-antiecho  
SF 150.9052832 MHz  
WDW QSINE  
SSB 2  
LB 0.00 Hz  
GB 0

Figure S4. HSQC spectrum of compound 1.

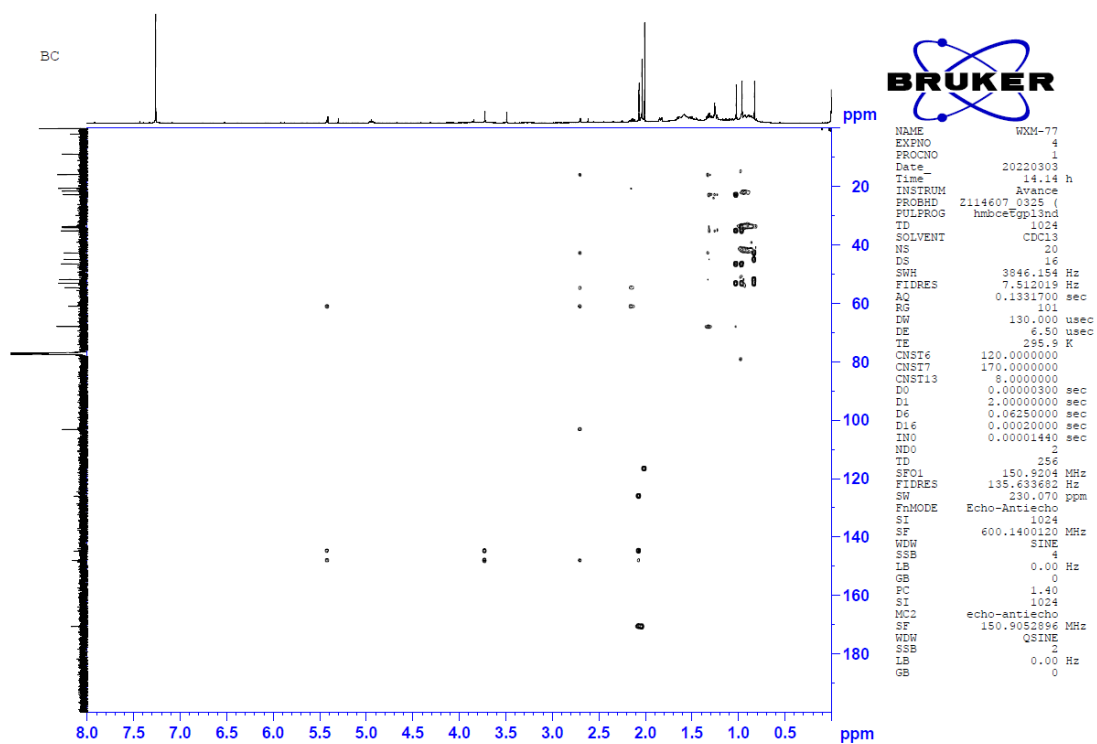

Figure S5. HMBC spectrum of compound **1**.

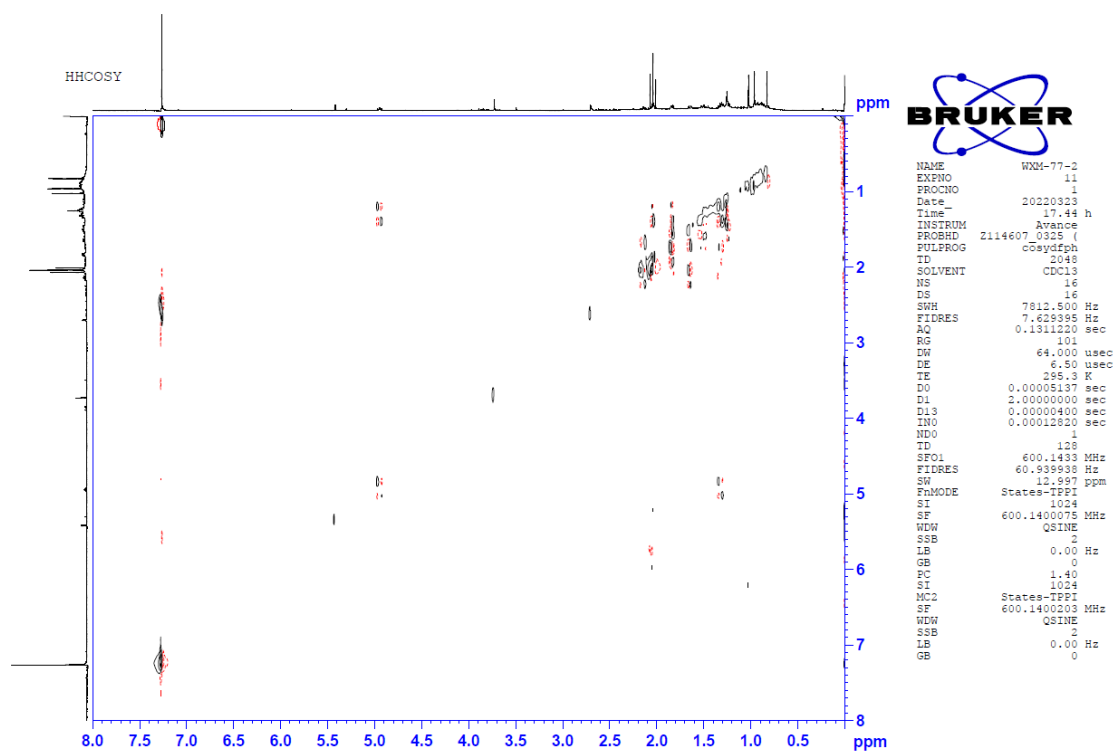

Figure S6.  $^1\text{H}$ - $^1\text{H}$  COSY spectrum of compound **1**.

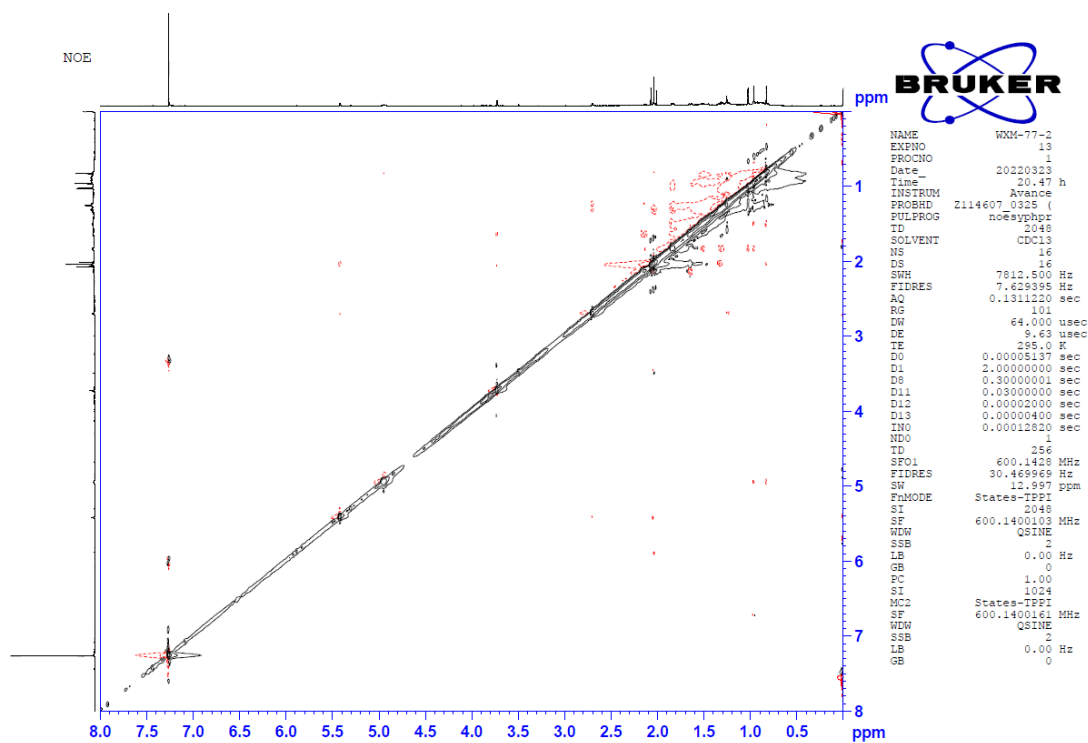

Figure S7. NOESY spectrum of compound **1**.

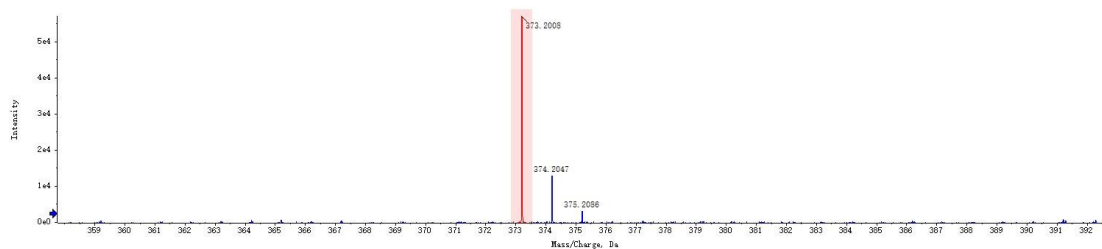

Figure S8. HRESIMS data of compound **1**.

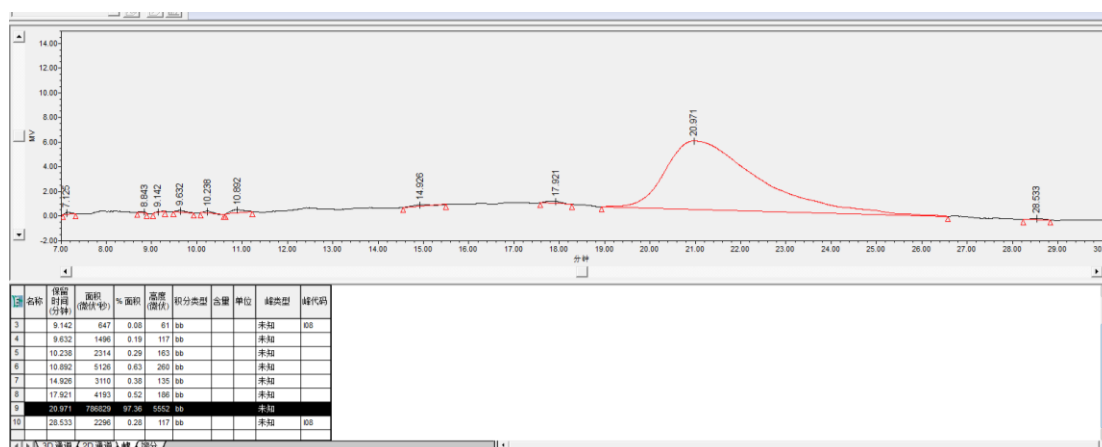

Figure S9. The purity of compound **1**.

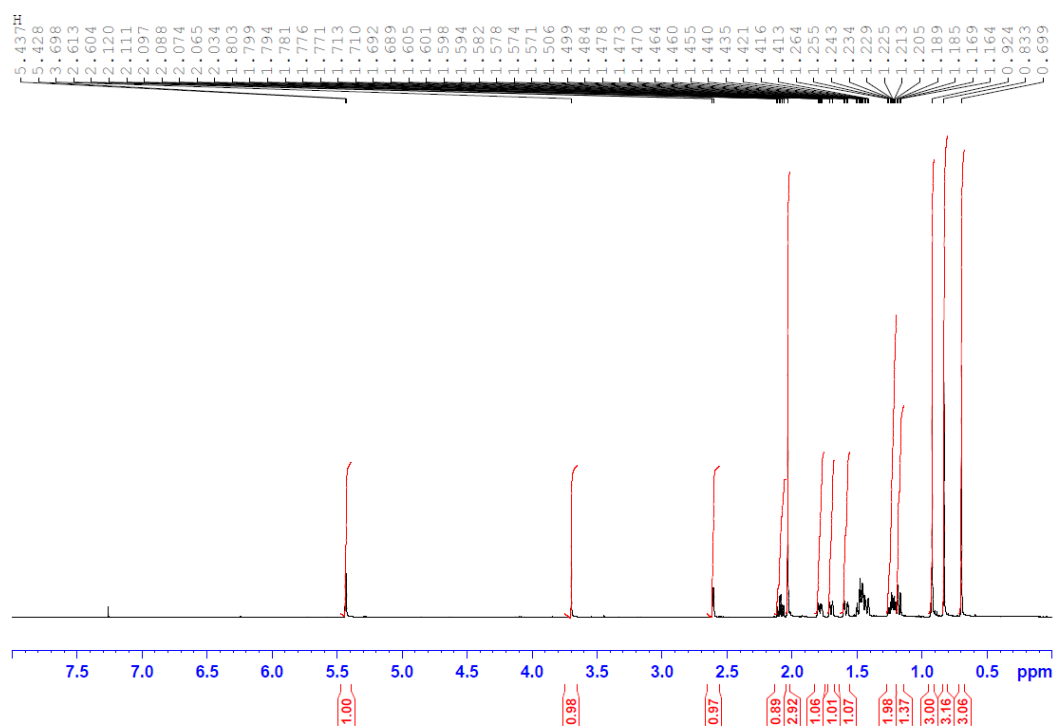

Figure S10.  $^1\text{H}$ -NMR spectrum of compound **2**.

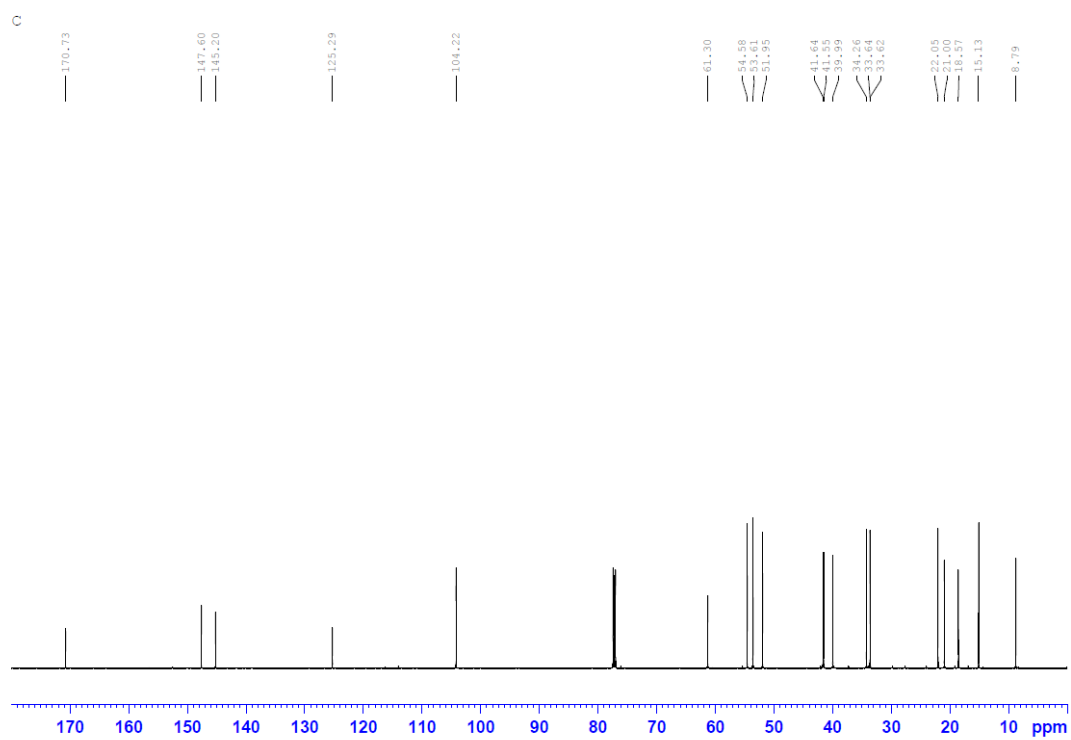

Figure S11.  $^{13}\text{C}$ -NMR spectrum of compound **2**.



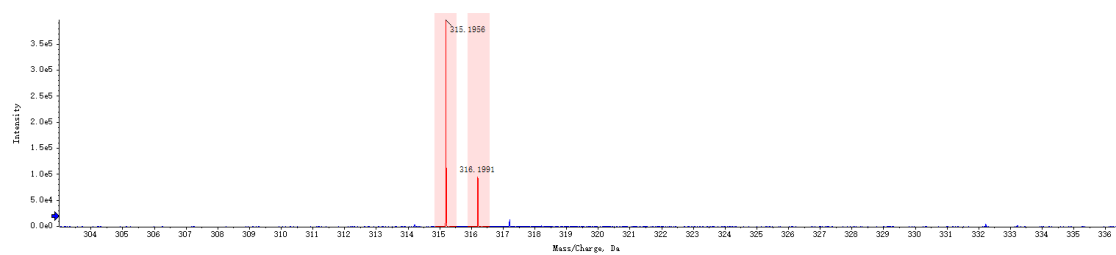

Figure S12. HRESIMS data of compound **2**.

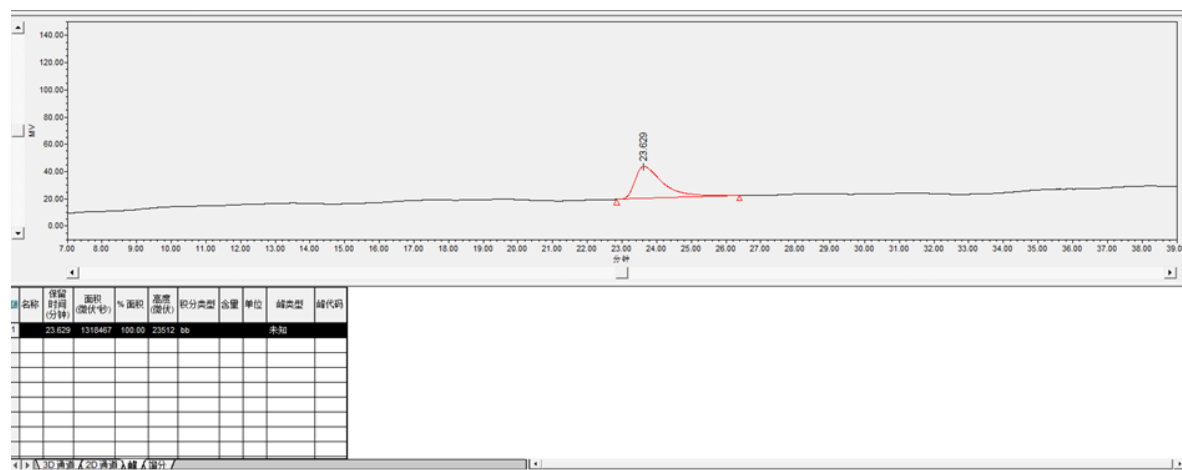

Figure S13. The purity of compound **2**.

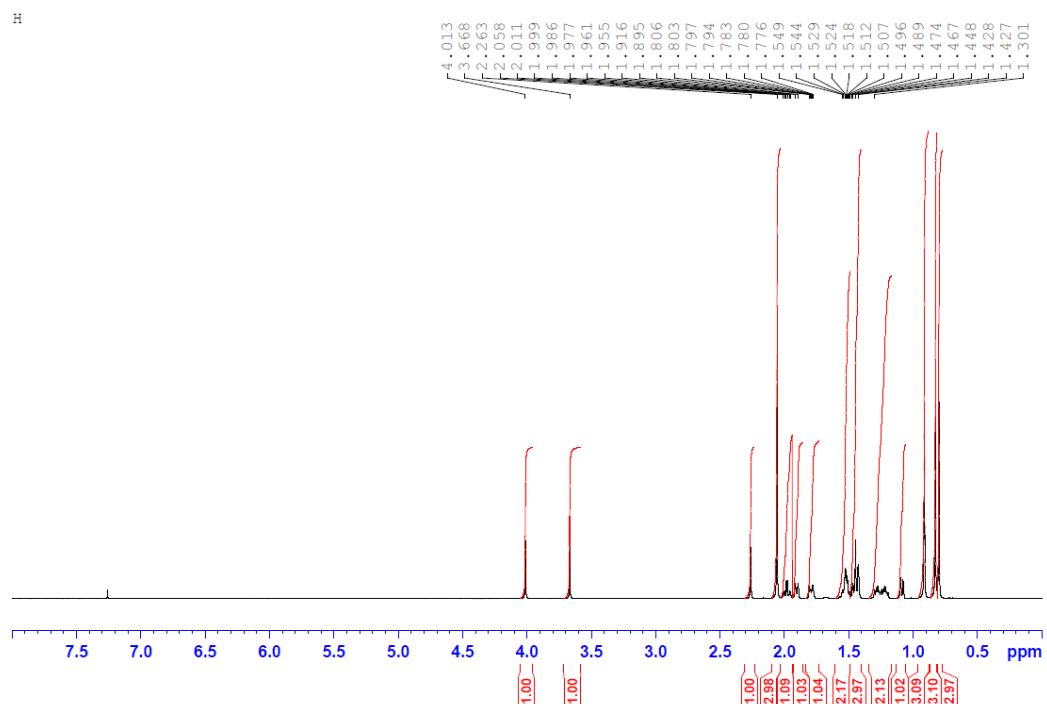

Figure S14. <sup>1</sup>H-NMR spectrum of compound **3**.

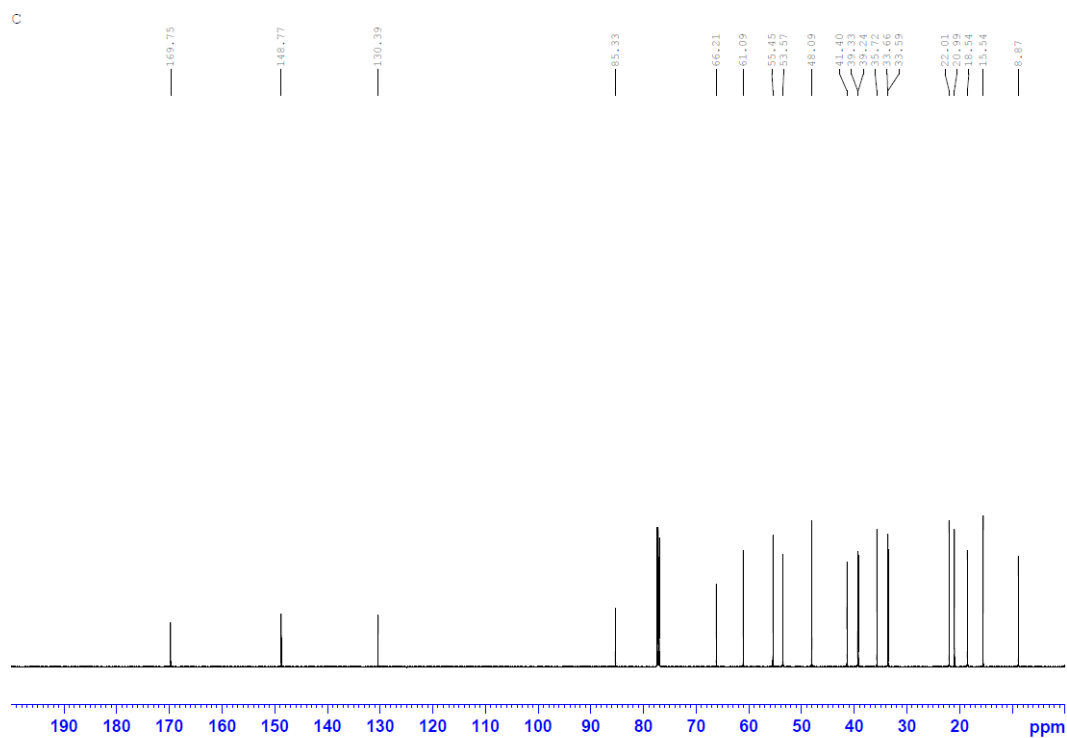

Figure S15.  $^{13}\text{C}$ -NMR spectrum of compound **3**.

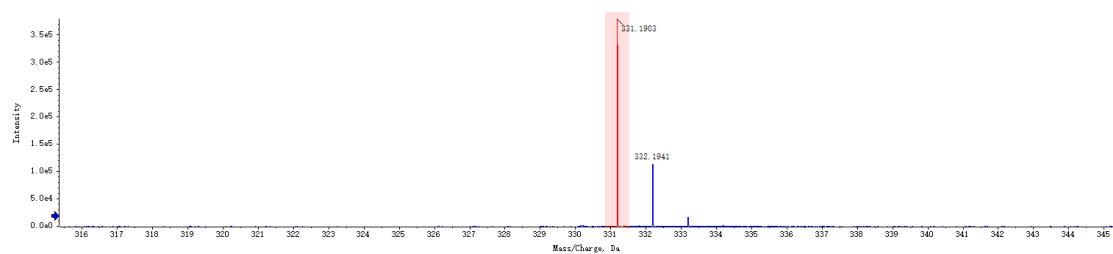

Figure S16. HRESIMS data of compound **3**.

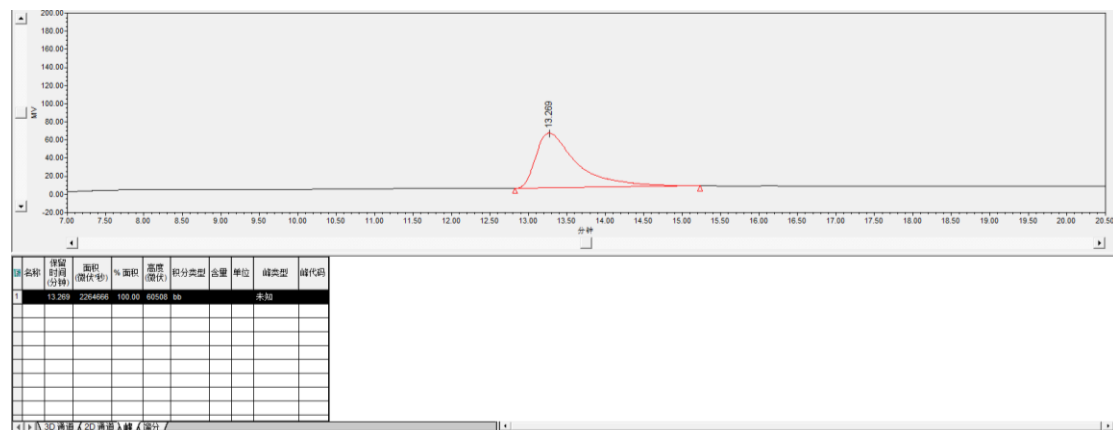

Figure S17. The purity of compound **3**.

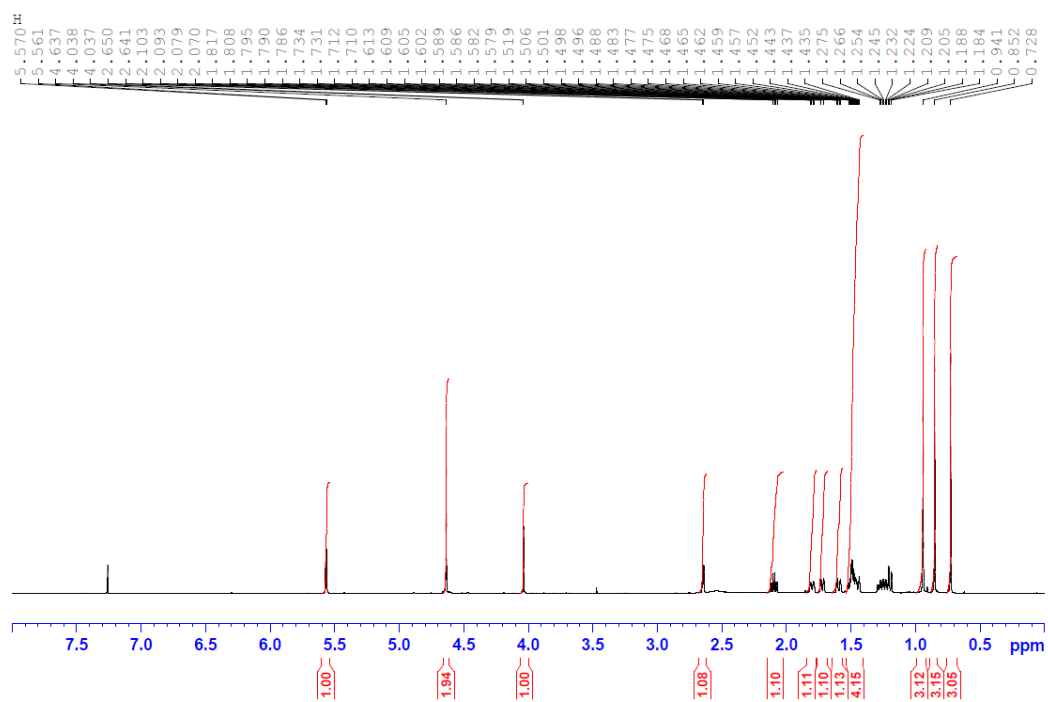

Figure S18.  $^1\text{H}$ -NMR spectrum of compound **4**.

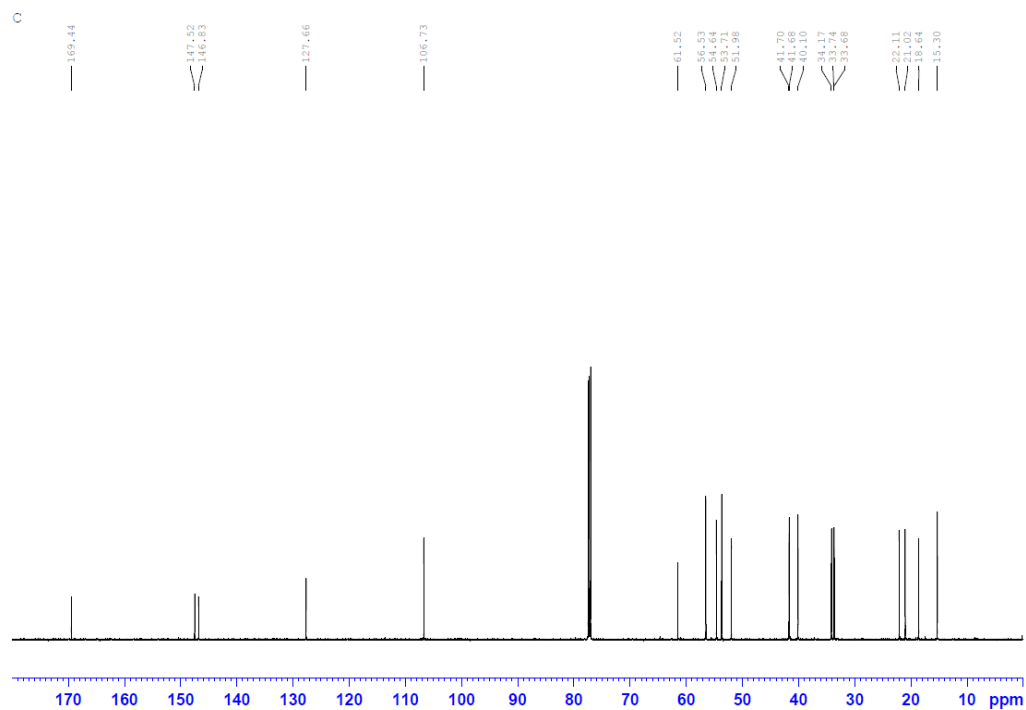

Figure S19.  $^{13}\text{C}$ -NMR spectrum of compound **4**.

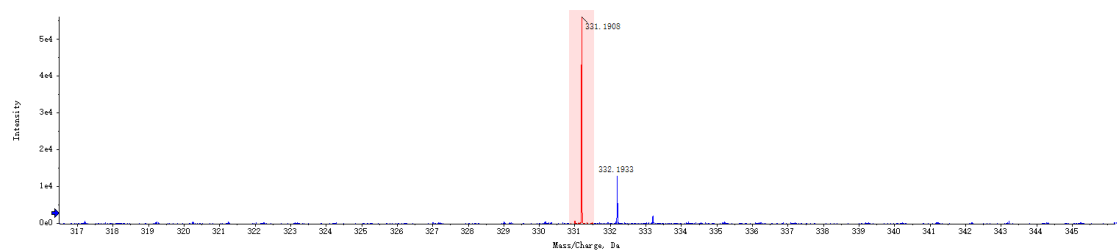

Figure S20. HRESIMS data of compound **4**.

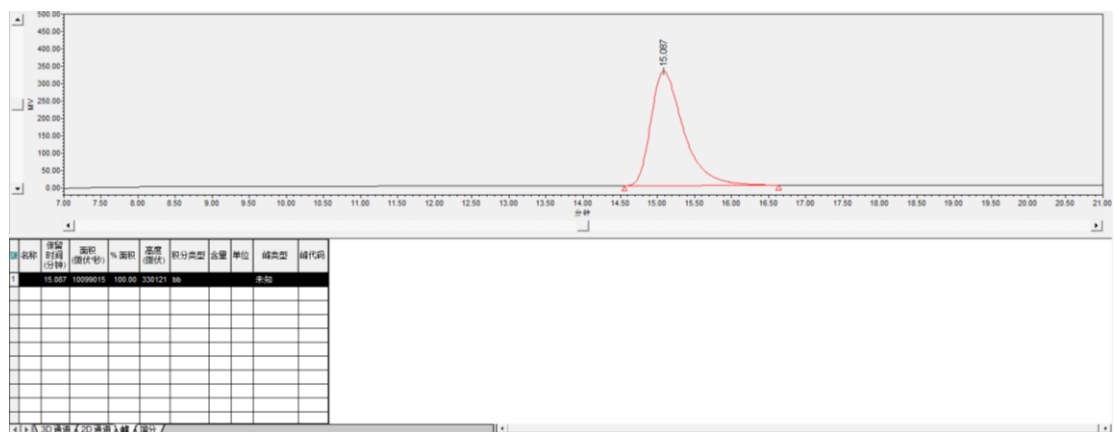

Figure S21. The purity of compound **4**.

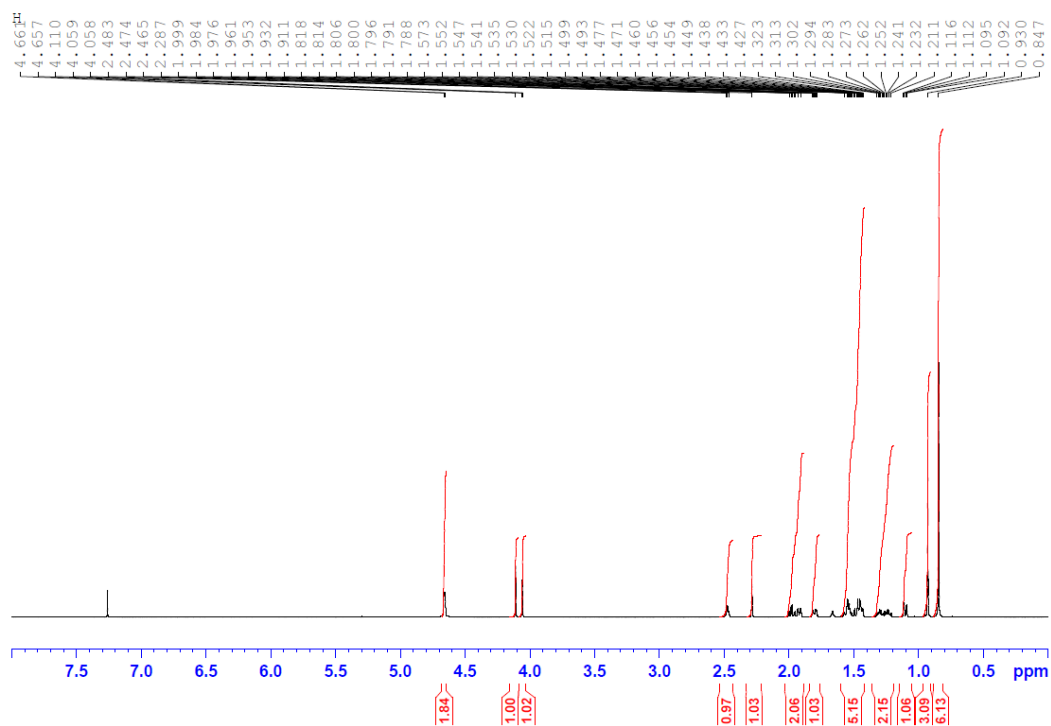

Figure S22. <sup>1</sup>H-NMR spectrum of compound **5**.

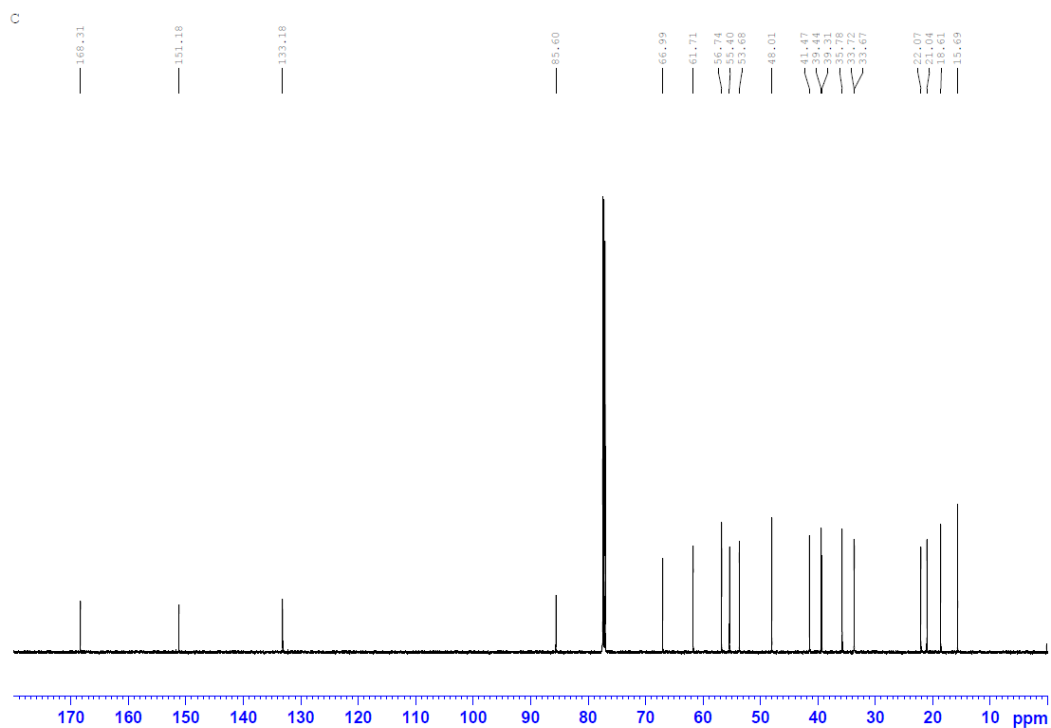

Figure S23. <sup>13</sup>C-NMR spectrum of compound **5**.

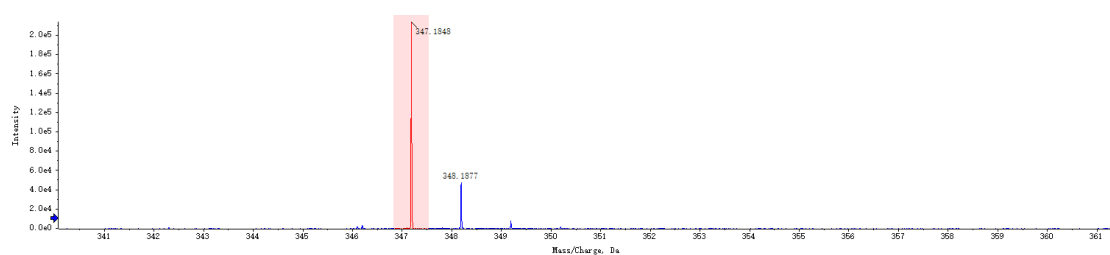

Figure S24. HRESIMS data of compound **5**.

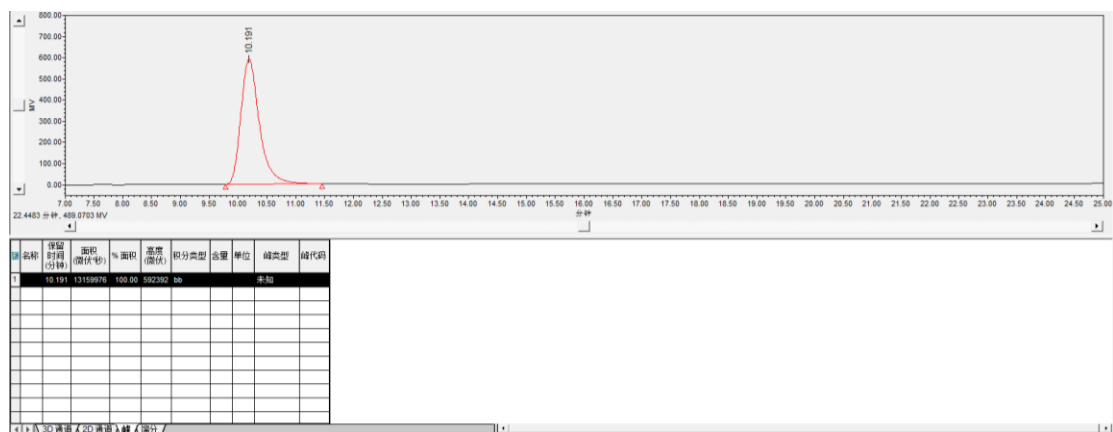

Figure S25. The purity of compound **5**.

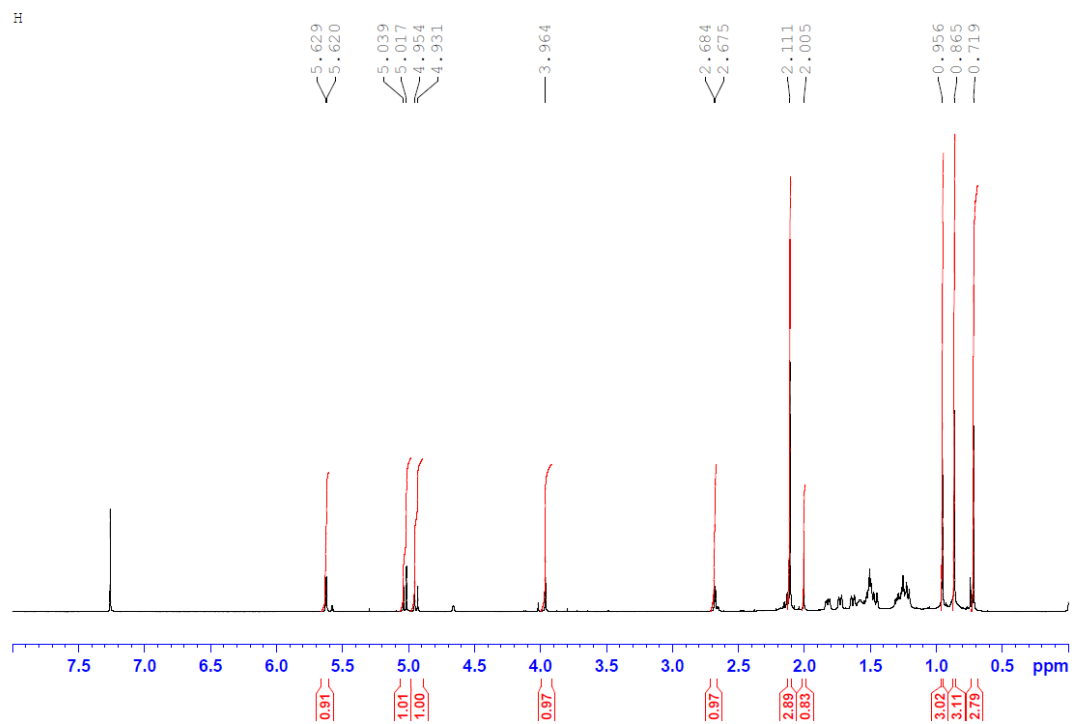

Figure S26. <sup>1</sup>H-NMR spectrum of compound **6**.

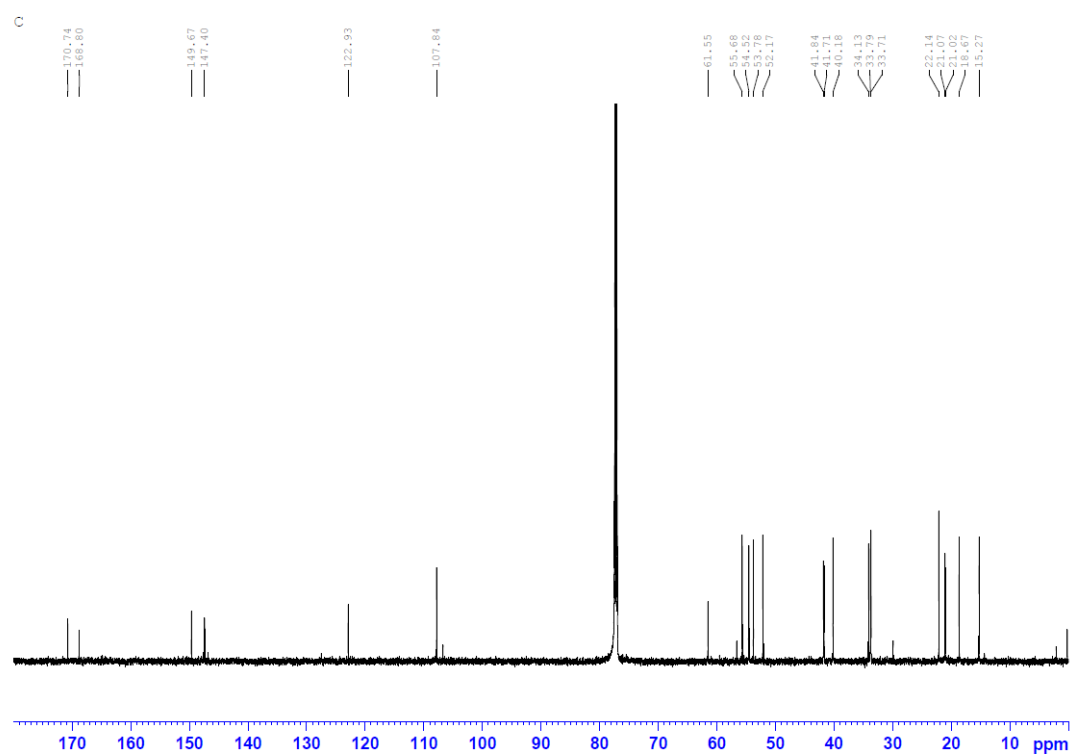

Figure S27. <sup>13</sup>C-NMR spectrum of compound **6**.

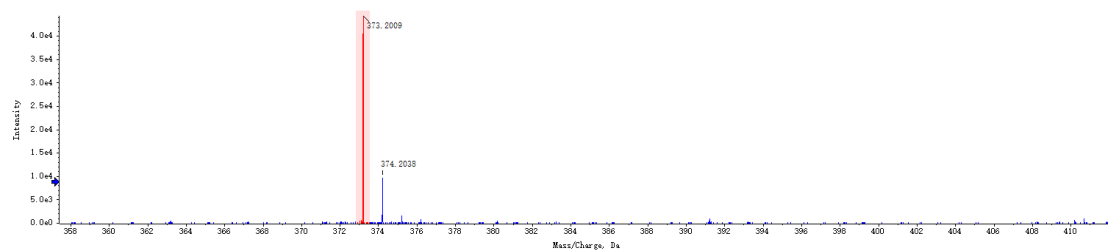

Figure S28. HRESIMS data of compound 6.

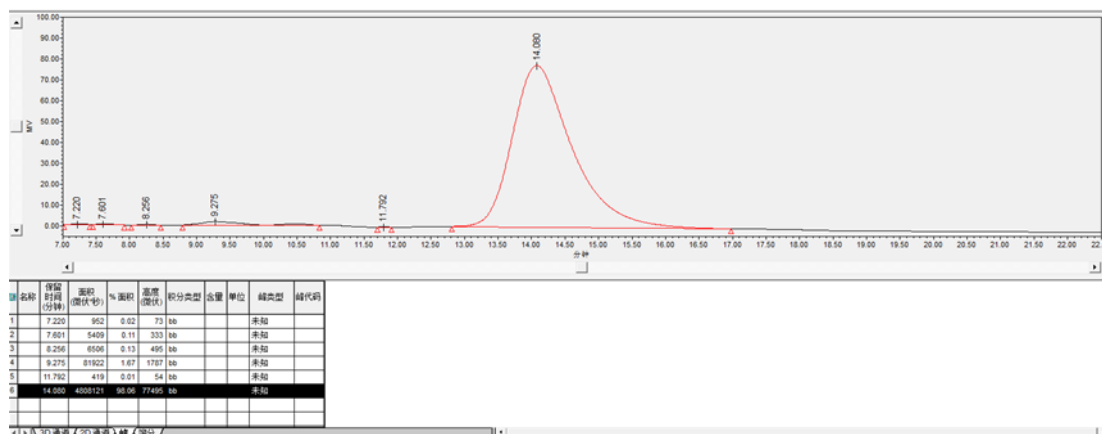

Figure S29. The purity of compound 6.

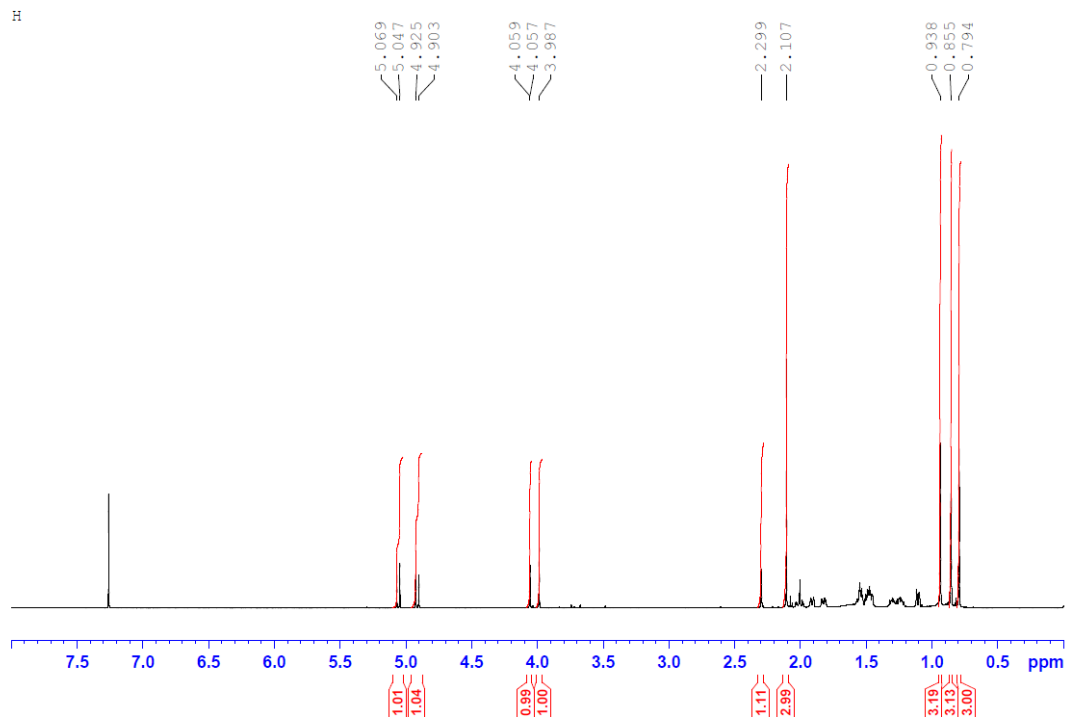

Figure S30.  $^1\text{H}$ -NMR spectrum of compound 7.

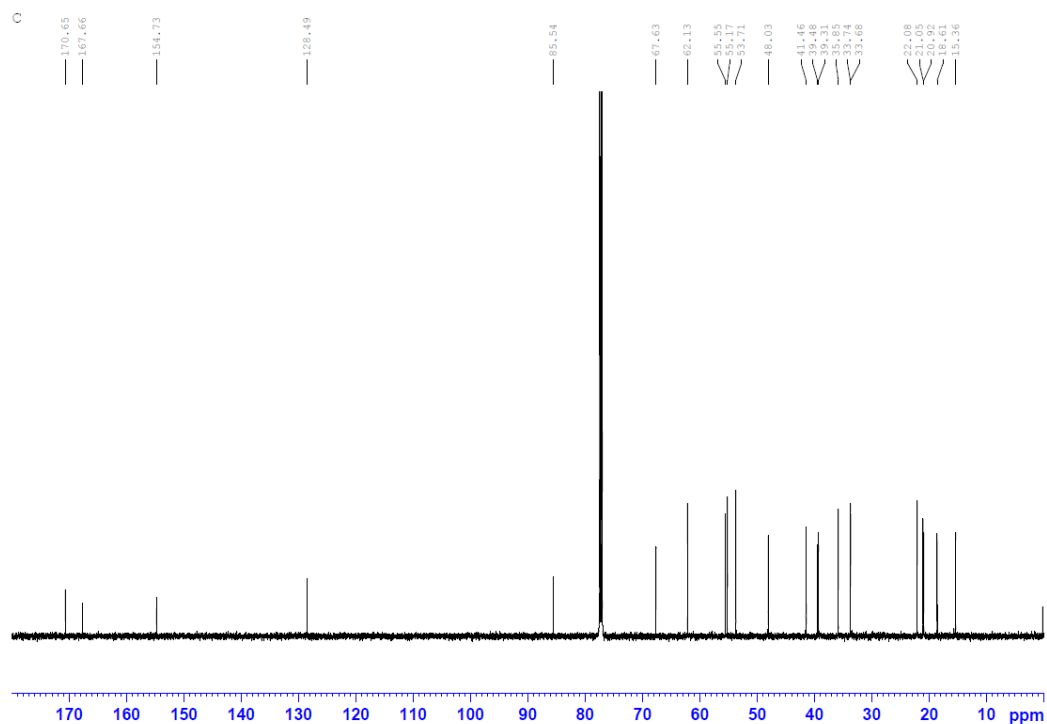

Figure S31.  $^{13}\text{C}$ -NMR spectrum of compound **7**.

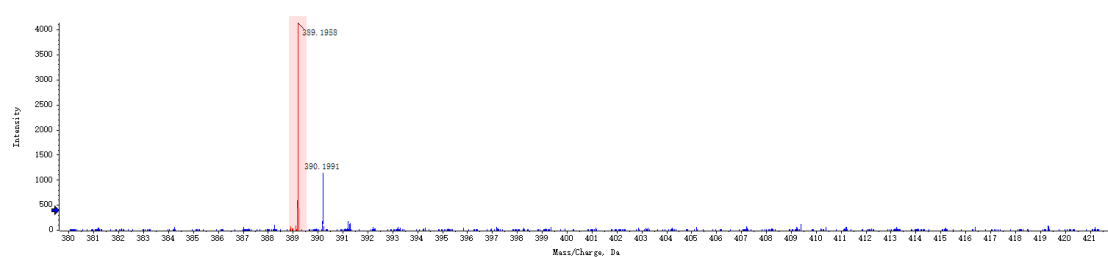

Figure S32. HRESIMS data of compound **7**.

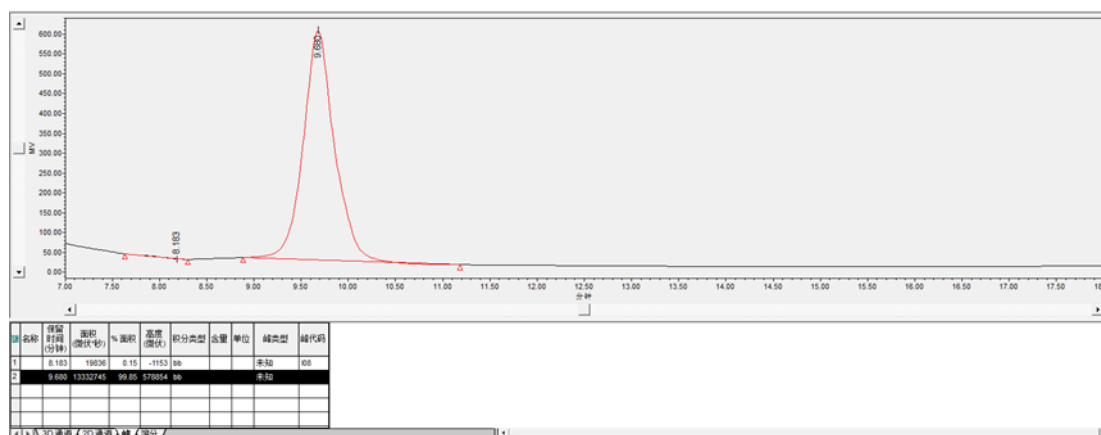

Figure S33. The purity of compound **8**.



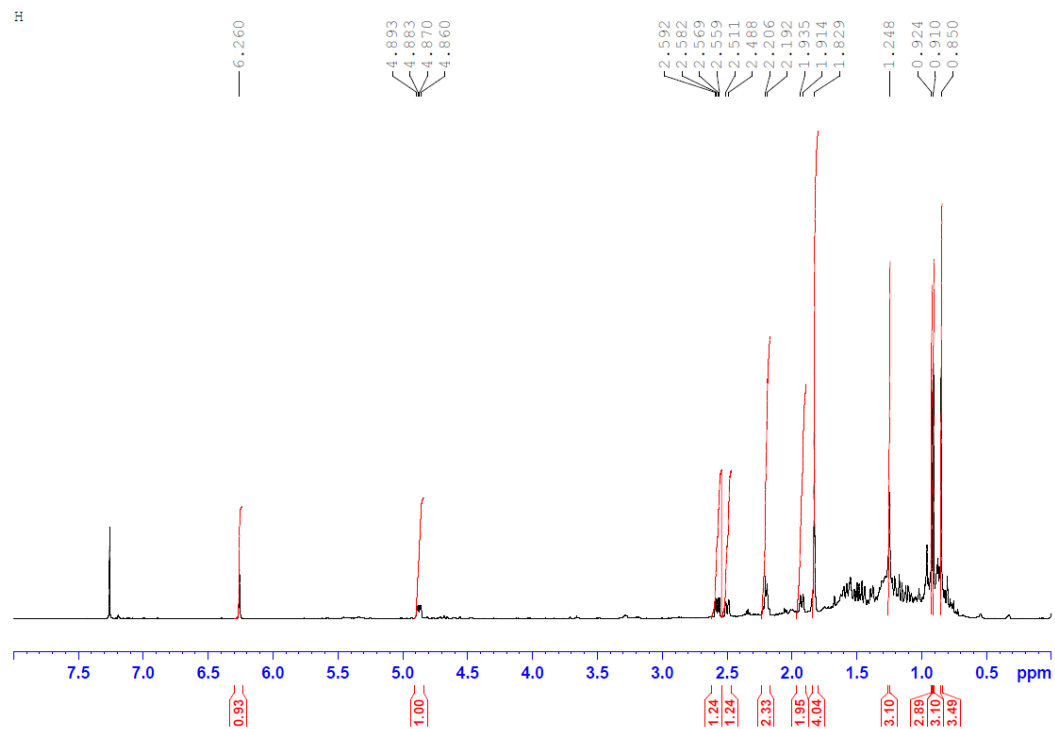

Figure S34. <sup>1</sup>H-NMR spectrum of compound **8**.

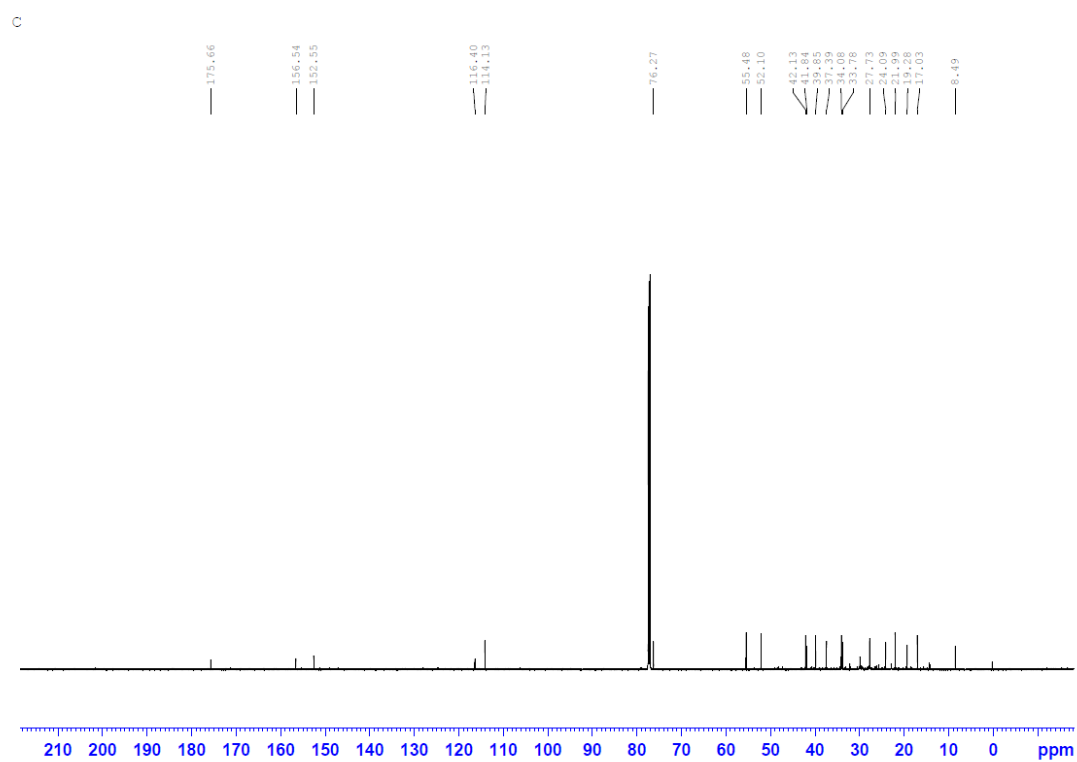

Figure S35. <sup>13</sup>C-NMR spectrum of compound **8**.

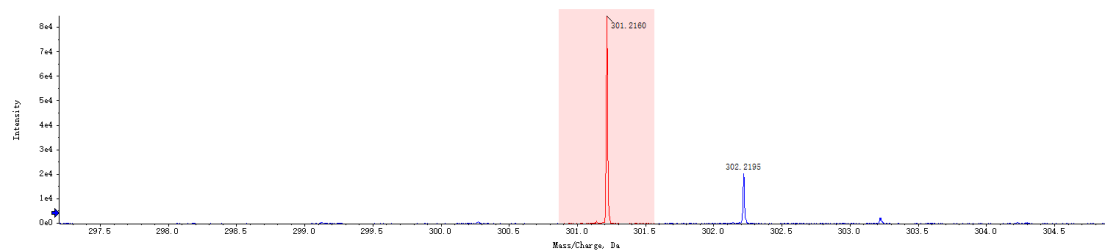

Figure S36. HRESIMS data of compound **8**.

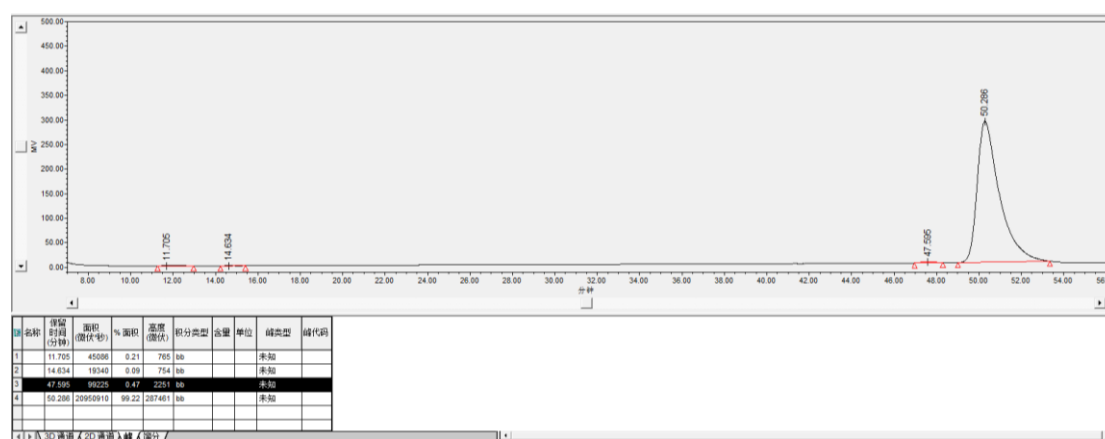

Figure S37. The purity of compound **8**.

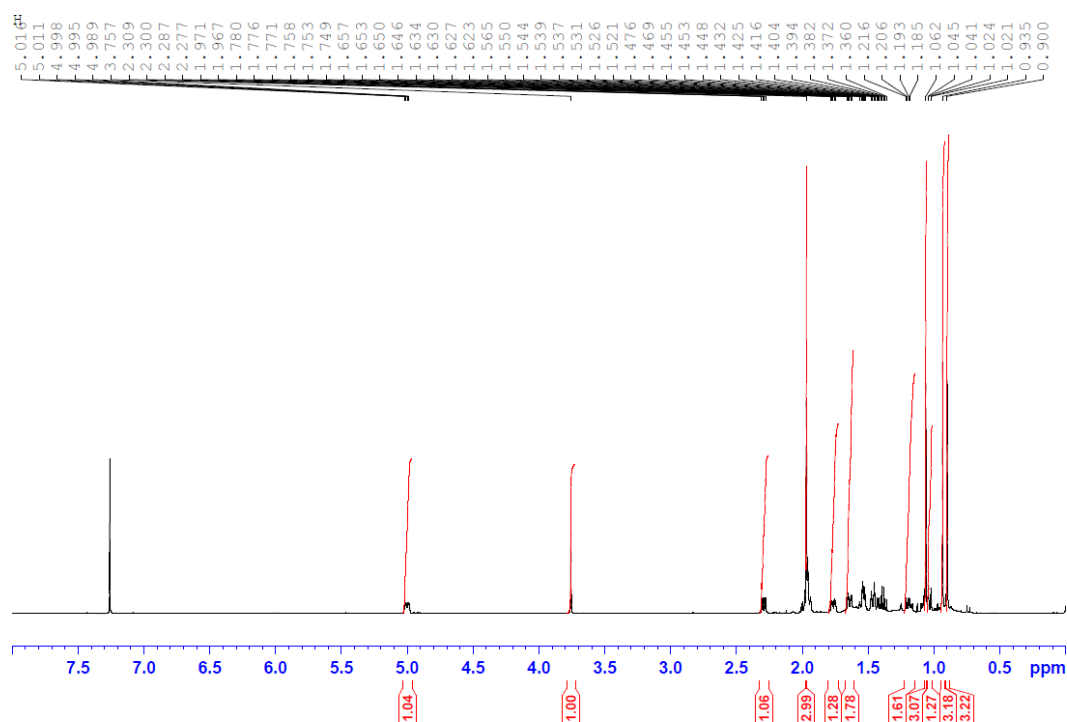

Figure S38. <sup>1</sup>H-NMR spectrum of compound **9**.

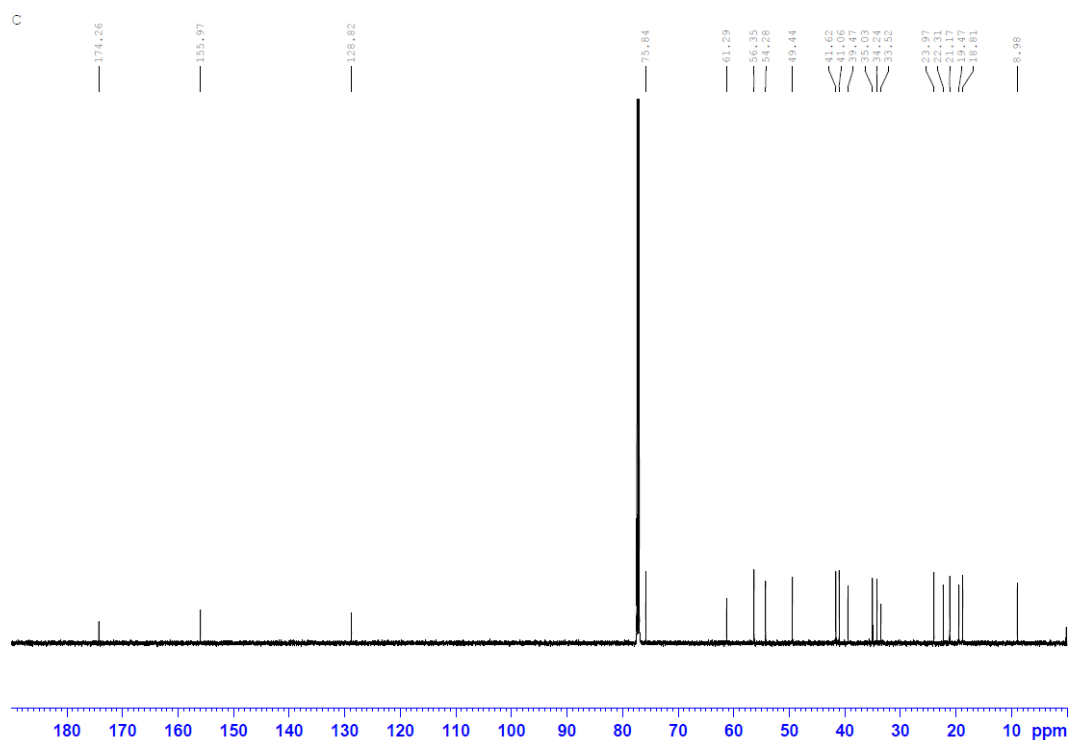

Figure S39. <sup>13</sup>C-NMR spectrum of compound **9**.

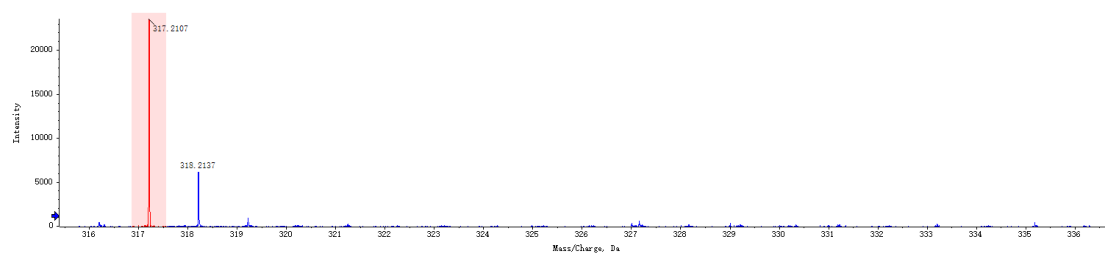

Figure S40. HRESIMS data of compound **9**.

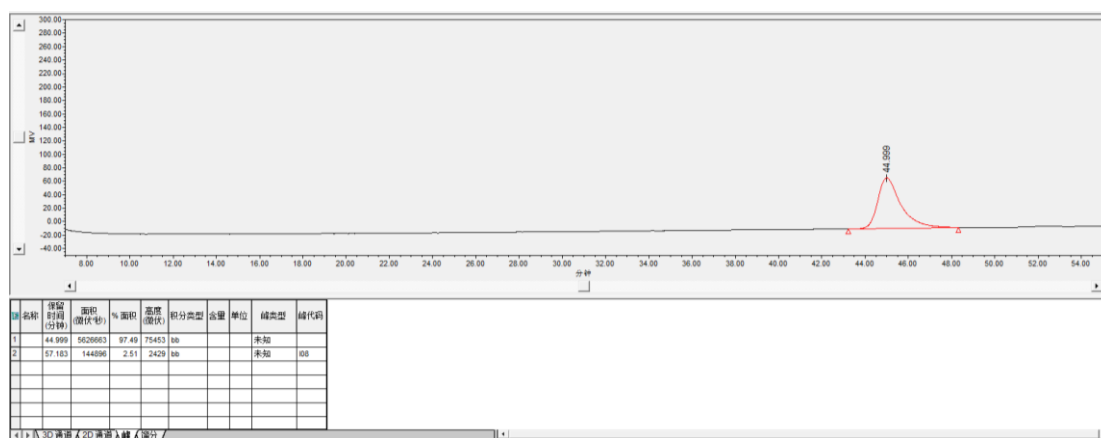

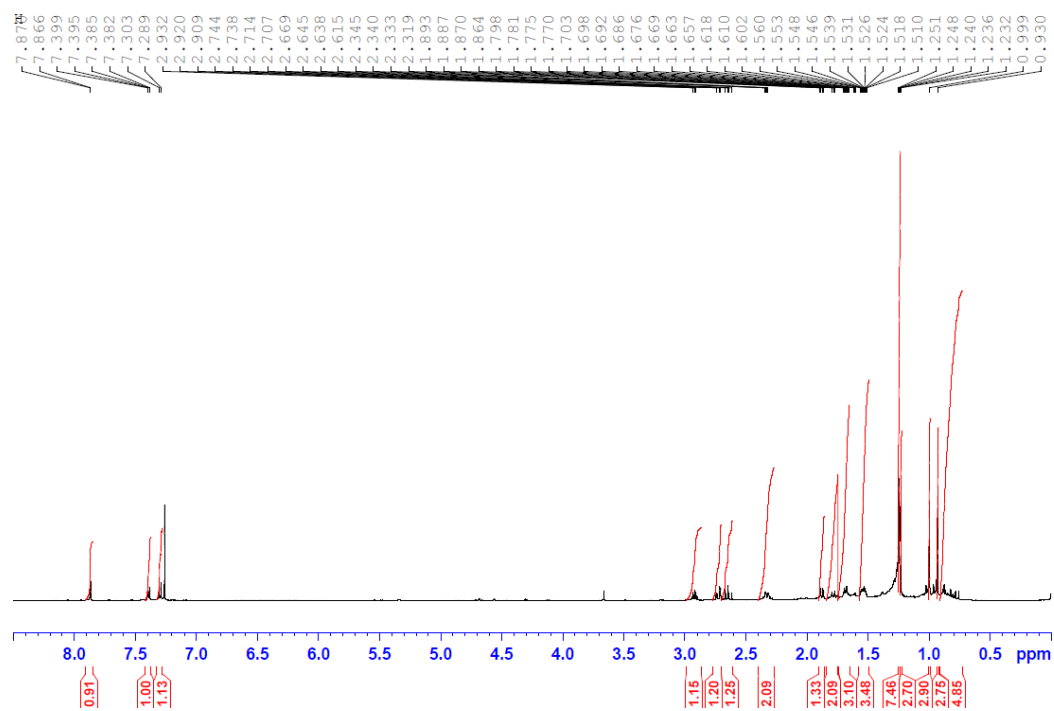

Figure S42. <sup>1</sup>H-NMR spectrum of compound **10**.

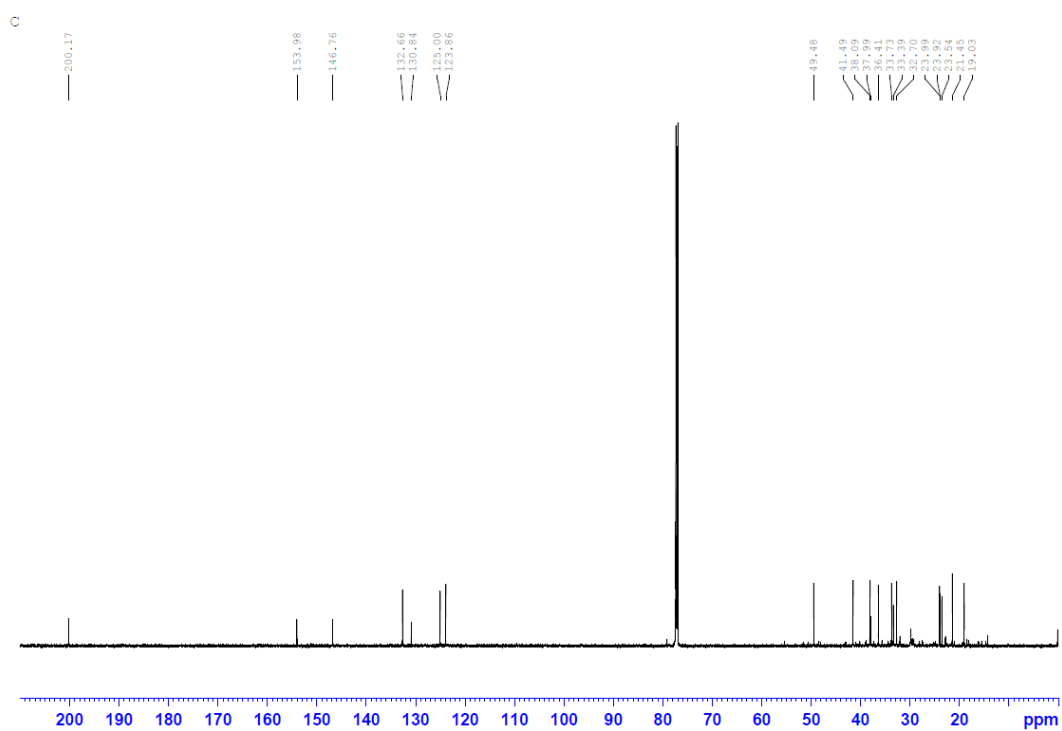

Figure S43. <sup>13</sup>C-NMR spectrum of compound **10**.

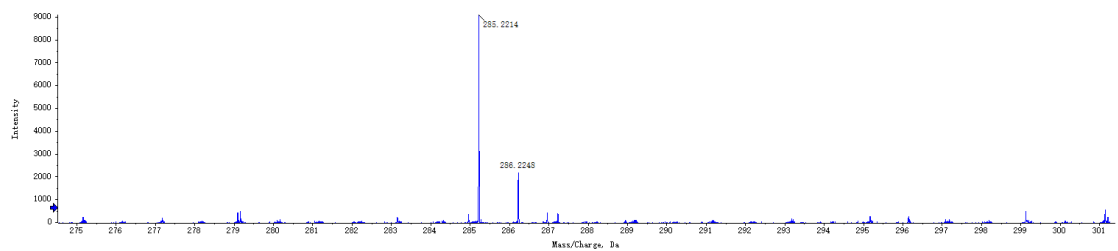

Figure S44. HRESIMS data of compound **10**.

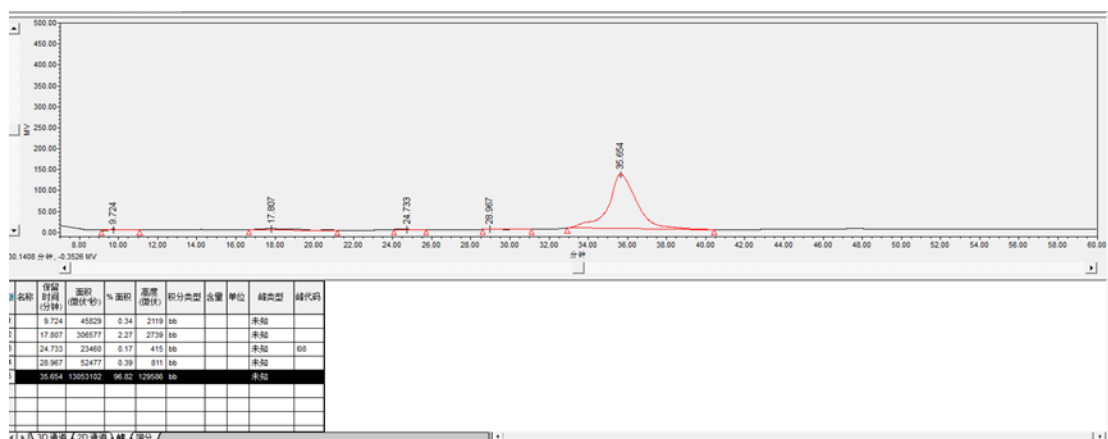

Figure S45. The purity of compound **10**.

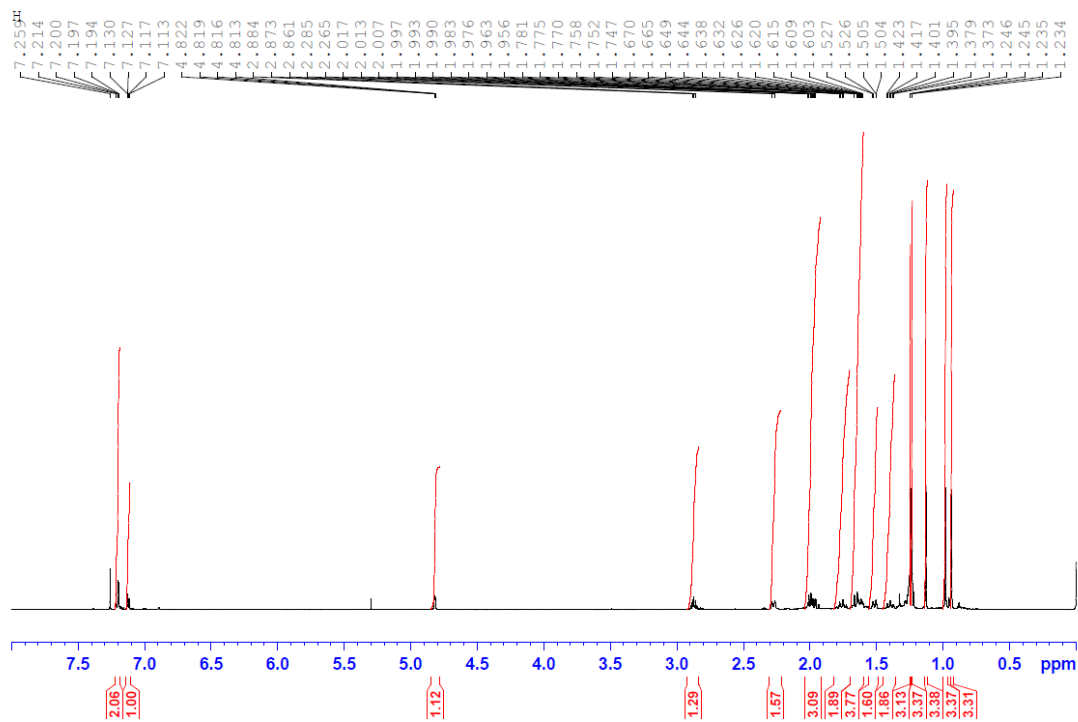

Figure S46.  $^1\text{H}$ -NMR spectrum of compound **11**.

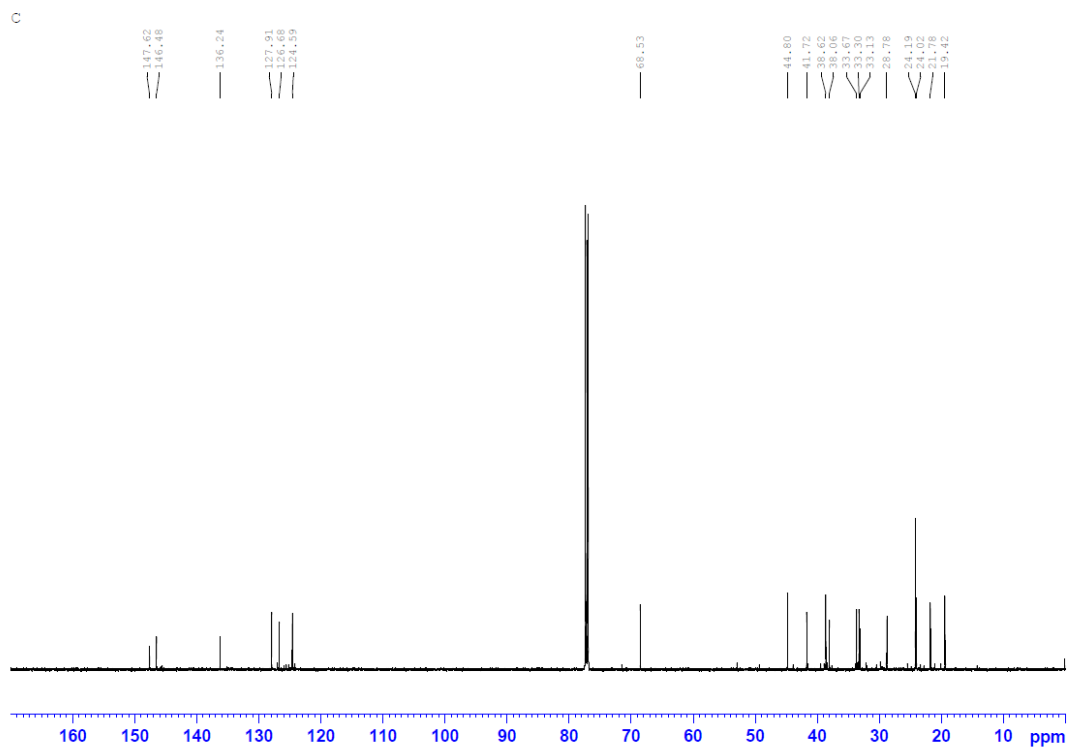

Figure S47. <sup>13</sup>C-NMR spectrum of compound **11**.

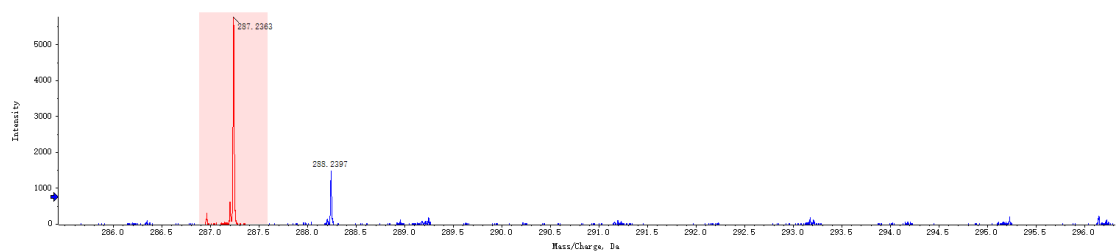

Figure S48. HRESIMS data of compound **11**.

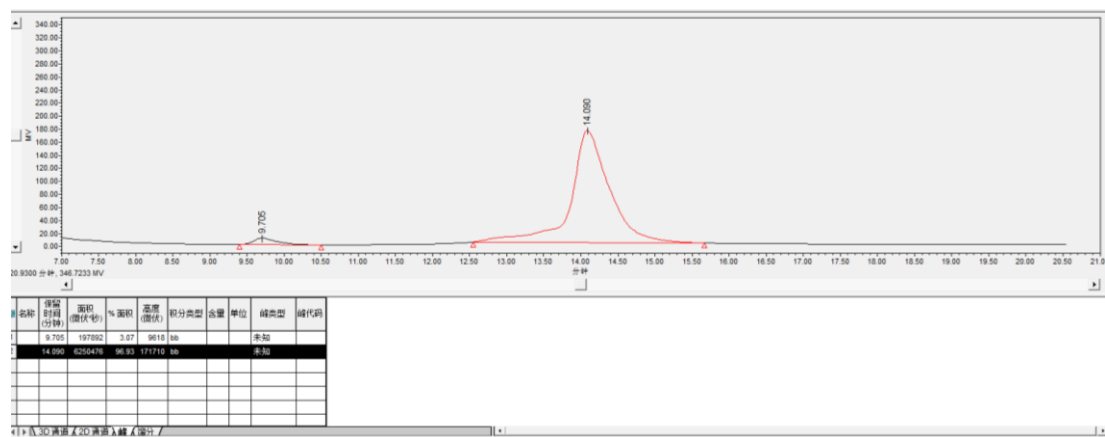

Figure S49. The purity of compound **11**.
